# Supplementary material
Source: PubMed Central journal article supplement (PMC7043936)
Supplement: EMS85842-supplement-Title_page.pdf [file EMS85842-supplement-Title_page.pdf]

Serena Nik-Zainal, Yasin Memari and Helen R. Davies

MRC Cancer Unit, Hutchison/MRC Research Centre, University of Cambridge,  
UK

Academic Laboratory of Medical Genetics, Addenbrookes Treatment Centre,  
Cambridge, UK
